# Supplementary material for: Effect of Fusarium proliferatum infection on physiological, phytochemical, and nutrient responses in garlic
Source: PeerJ. 2025 Jun 20;13:e19601. doi: 10.7717/peerj.19601 (PMC12184669; doi:10.7717/peerj.19601)
Supplement: Supplemental Information 1 [file peerj-13-19601-s001.xlsx]

## Sheet: Total Phenolic
			7	5	1	9	10	11
			Healthy			Diseased
		mg/kg(gallik asit cinsinden)/yaş ağırlık	Yerli-Konya	Babaeski-Kırklareli	İran-Balıkesir	Yerli-Konya	Babaeski-Kırklareli	İran-Balıkesir
		toplam fenolik	5400.96	5264.72	3634.33	7347.44	8790.07	7664.61
				5400.96	7347.44	6374.2
				5264.72	8790.07	7027.4
				3634.33	7664.61	5649.47
						4766.67
				4766.67	7934.04	7934.04
						6350.36

## Sheet: protein
			7	5	1	9	10	11
			Healthy			Diseased
		protein (%)	Local-Konya	Babaeski-Kırklareli	Iranian-Balıkesir	Local-Konya	Babaeski-Kırklareli	Iranian-Balıkesir
		protein (%)	4.23	4.93	4.18	4.12	4.56	3.53			0.81
											0.96
											0.81
											0.81
			0.08		0.08	0.01	0.045				0.91
			0.09		0.09	0.02	0.055				0.67
			0.07		0.07	0.01	0.04
			0.01				0.012
			0.02		0.08	0.0133333	0.08			6087.02	5626.12
			0.01								6087.02
							0.0464

## Sheet: Phenolic
			7	5	1	9	10	11
			Healthy			Diseased
	Unit		Local-Konya	Babaeski-Kırklareli	Iranian-Balıkesir	Local-Konya	Babaeski-Kırklareli	Iranian-Balıkesir
	mg kg-1	Chlorogenic acid	210.99	220.46	88.35	149.78	75.48	137.6	147.11
	mg kg-1	Catechine hydrate	0	0	0	0	276.43	252.55	88.1633
	mg kg-1	Caffeic acid	0	0.91	0.36	3.01	1.34	1.32	1.15667
	mg kg-1	4-hydroxy benzoic acid	0	0	0	0	0	0.36	0.06
	mg kg-1	Vanillin	0	0	0	0.23	0	0	0.0383333
	mg kg-1	Rutin	0	0	0	0	0	0	0
	mg kg-1	t-ferulic acid	0	0	0	0	0	0	0
	mg kg-1	Hydroxy sinamic acid	0	0	0	0.69	0.67	5.19	1.09167
	mg kg-1	Naringin	0	2.04	0	0	0	0	0.34
	mg kg-1	O-coumaric acid	0	0.13	0.01	0	0.1	0.03	0.045
	mg kg-1	Rosmarinic acid	2.23	0	0	0	0	0	0.371667
	mg kg-1	Salicylic acid	0	0	0	0	0	0	0
	mg kg-1	Resveratrol	0.051	0.048	0.042	0.144	0.171	0.461	0.152833
	mg kg-1	Quercetin	1.23	1.89	0	0	1.61	2.74	1.245
	mg kg-1	t-cinamic acid	0	0	0	0	0	3.922	0.653667
	mg kg-1	Naringenin	0	0	0	0	0	0	0
	mg kg-1	Chrysin	3.62	28.07	0	3,62c	1.47	0	6.632
	mg kg-1	Flavones	0	0	0	4.04	9.76	0	2.3
			12.1178	14.086	4.93122	9.28788	20.3906	22.4541

## Sheet: Organic acid
			7	5	1	9	10	11
			Healthy			Diseased
	Unit		Local-Konya	Babaeski-Kırklareli	Iranian-Balıkesir	Local-Konya	Babaeski-Kırklareli	Iranian-Balıkesir
	mg kg-1	Oxalic acid	0	4.01	7.01	15.17	0	10.56	6.125
	mg kg-1	Citric acid	4322.72	4175.95	3654.26	4781.87	6291.02	5498.69	4787.42
	mg kg-1	Tartaric acid	1100.43	0	0	219.92	377.59	0	282.99
	mg kg-1	Malic acid	0	0	0	0	305.87	274.54	96.735
	mg kg-1	Succinic acid	9281.79	1386.63	580.82	11579.8	1159.36	951.96	4156.73
	mg kg-1	Lactic acid	0	13639.2	11168.8	0	20840.8	2031.9	7946.78
	mg kg-1	Formic acid	0	0	0	147.37	0	176.03	53.9
	mg kg-1	Acetic acid	0	0	0	1455.32	3675.93	0	855.208
	mg kg-1	Fumaric acid	5.18	0	0	8.02	0	0	2.2
	mg kg-1	Propionic acid	292.11	353.52	262.93	272.63	795.44	483.47	410.017
	mg kg-1	Isobutyric acid	0	0	0	0	0	0	0
	mg kg-1	Butyric acid	0	892.23	0	0	0	0	148.705
			1250.19	1704.29	1306.15	1540.01	2787.17	785.596

## Sheet: Carbohydrates
			7	5	1	9	10	11
			Healthy			Diseased
	Unit		Local-Konya	Babaeski-Kırklareli	Iranian-Balıkesir	Local-Konya	Babaeski-Kırklareli	Iranian-Balıkesir
	mg kg-1	Fructose	0	0	0	0	0	0
	mg kg-1	Glicose	0	0	0	0	0	0
	mg kg-1	Sucrose	2.40117	2.84454	2.58401	3.77487	1.15105	1.58709
					2.40117	3.77487	3.08802
					2.84454	1.15105	1.99779
					2.58401	1.58709	2.08555
							2.61
					2.60991	2.171	2.17
							2.39027

## Sheet: Elements
			7	5	1	9	10	11
			Healthy			Diseased
	Unit		Local-Konya	Babaeski-Kırklareli	Iranian-Balıkesir	Local-Konya	Babaeski-Kırklareli	Iranian-Balıkesir		N	P	K	Ca	Cu	Mn	Fe	Zn	Mg	Na	Ni
	%	N	0.81	0.96	0.81	0.81	0.91	0.67
	(mg/100g)	P	299.82	432.35	492.21	430.62	477.32	498.35		299.82		5686.53	1585.47	1.79
	(mg kg-1)	K	5686.53	6996.49	5578.04	5607.23	6472.62	4798.5		432.35		6996.49	2048.54	2.51
	(mg kg-1)	Ca	1585.47	2048.54	1766.28	1374.31	1712.5	1337.88		492.21		5578.04	1766.28	2.24
	(mg kg-1)	Cu	1.79	2.51	2.24	4.39	2.28	0.2		430.62		5607.23	1374.31	4.39
	(mg kg-1)	Mn	5.6	12.5	9.73	6.7	10.4	1.88		477.32		6472.62	1712.5	2.28
	(mg kg-1)	Fe	15.89	30.98	28.15	16.7	30.06	13.41		498.35		4798.5	1337.88	0.2
	(mg kg-1)	Zn	14.78	20.79	18.15	18.72	21.66	12.47
	(mg kg-1)	Mg	242.9	425.4	275.44	221.64	279.71	204.97
	(mg kg-1)	Na	147.39	174.98	160.3	99.54	176.19	124.37
	(mg kg-1)	Ni	0.08	0.09	0.07	0.01	0.02	0.01
					4.23	4.12	4.175
					4.93	4.56	4.745
					4.18	3.53	3.855
							4.45
					4.44667	4.07	4.07
							4.259

## Sheet: Antioxidan Act.
			7	5	1	9	10	11
			Healthy			Diseased
		%inhibition	Local-Konya	Babaeski-Kırklareli	Iranian-Balıkesir	Local-Konya	Babaeski-Kırklareli	Iranian-Balıkesir
		DPPH %inhibition	39.07	33.63	29.94	51.25	41.57	46.57
				39.07	51.25	45.16
				33.63	41.57	37.6
				29.94	46.57	38.255
						34.2133
				34.2133	46.4633	46.4633
						40.3383
